# Supplementary material for: Novel Natural Inhibitors of CYP1A2 Identified by in Silico and in Vitro Screening
Source: Int J Mol Sci. 2011 May 18;12(5):3250–62. doi: 10.3390/ijms12053250 (PMC3116189; doi:10.3390/ijms12053250)
Supplement: Supplementary file 1 [file ijms-12-03250-s001.pdf]

## Supplementary Materials

**Table S1.** Two prioritizing results by docking (Top 30 from 147).

| Index | Result 1 * | Result 2 * |
|-------|------------|------------|
| 1     | zhang84    | zhang83    |
| 2     | zhang205   | zhang84    |
| 3     | zhang83    | zhang 210  |
| 4     | zhang206   | zhang 205  |
| 5     | zhang89    | zhang 206  |
| 6     | zhang911   | zhang 817  |
| 7     | zhang445   | zhang 911  |
| 8     | zhang759   | zhang 89   |
| 9     | zhang271   | zhang 779  |
| 10    | zhang210   | zhang 759  |
| 11    | zhang272   | zhang 284  |
| 12    | zhang 713  | zhang 445  |
| 13    | zhang 300  | zhang 271  |
| 14    | zhang 9    | zhang 272  |
| 15    | zhang 179  | zhang 616  |
| 16    | zhang 1010 | zhang 135  |
| 17    | zhang 876  | zhang 381  |
| 18    | zhang 616  | zhang 713  |
| 19    | zhang 284  | zhang 300  |
| 20    | zhang 779  | zhang 9    |
| 21    | zhang 755  | zhang 836  |
| 22    | zhang 520  | zhang 1010 |
| 23    | zhang 358  | zhang 358  |
| 24    | zhang 132  | zhang 850  |
| 25    | zhang 676  | zhang 132  |
| 26    | zhang 821  | zhang 520  |
| 27    | zhang 817  | zhang 28   |
| 28    | zhang 850  | zhang 821  |
| 29    | zhang 28   | zhang 731  |
| 30    | zhang 381  | zhang 755  |

\*: Indicated by the compound IDs named in our lab.

**Table S2.** Effect of 202 active ingredients of herbs at a Concentration of 1  $\mu$ M on Rh CYP1A2-mediated phenacetin *O*-deethylation.

| Active Ingredients  | % of Control Indication Activity (Mean) | Active Ingredients | % of Control Indication Activity (Mean) |
|---------------------|-----------------------------------------|--------------------|-----------------------------------------|
| Artemisinin         | 80.7                                    | Icaritin           | >90                                     |
| Chrysin             | 4.6                                     | Imperatorin        | >90                                     |
| Chrysophanol        | 77.7                                    | Indirubin          | >90                                     |
| Dracorhodin         | 21.1                                    | Indigo             | >90                                     |
| Ethoxychelerythrine | 88.9                                    | Irisflorentin      | >90                                     |
| Galangin            | 78.2                                    | Isoferulic acid    | >90                                     |

**Table S2. Cont.**

|                          |      |                                    |     |
|--------------------------|------|------------------------------------|-----|
| Honokiol                 | 33.6 | Isofraxidin                        | >90 |
| Luteolin                 | 87.4 | Isopsoralen                        | >90 |
| Nuciferine               | 85.5 | Isorhamnetin                       | >90 |
| Osthole                  | 86.8 | Jatrorrhizine Hydrochloride        | >90 |
| Psoralen                 | 10.8 | Jervine                            | >90 |
| Tanshinone IIA           | 28.3 | Kaempferol                         | >90 |
| Wogonin                  | 74.6 | Kirenol                            | >90 |
| Aconitine                | >90  | Liensinine                         | >90 |
| Alantolactone            | >90  | Linarin                            | >90 |
| Aloe-emodin              | >90  | Linderane                          | >90 |
| Alpinetin                | >90  | Linderane_1                        | >90 |
| Ammothamnine             | >90  | Liquidambaric acid                 | >90 |
| Amygdalin                | >90  | Liquiritin                         | >90 |
| Andrographolide          | >90  | Lobetyolin                         | >90 |
| Anisaldehyde             | >90  | Loganin                            | >90 |
| Arctiin                  | >90  | Magnolol                           | >90 |
| Arecoline                | >90  | Magnolin                           | >90 |
| Aristolochic Acid        | >90  | Matrine                            | >90 |
| Asiaticoside             | >90  | Menthol                            | >90 |
| Astragaloside            | >90  | Mesaconitine                       | >90 |
| Atropine Sulfate         | >90  | 4-Methoxysalicylaldehyde           | >90 |
| Baicalein                | >90  | Methyl nonylketone                 | >90 |
| Baicalin                 | >90  | 5-O-Methylvisammioside             | >90 |
| Barbaloin                | >90  | Mollugin                           | >90 |
| Berberine Hydrochloride  | >90  | Momordin Ic                        | >90 |
| Bergenin                 | >90  | Musccone                           | >90 |
| Betaine                  | >90  | Naringenin                         | >90 |
| Bilobalide               | >90  | Naringin                           | >90 |
| Borneolum                | >90  | Nitidine                           | >90 |
| Bornylacetate            | >90  | Notoginsenoside R1                 | >90 |
| Bufalin                  | >90  | Oleanolic acid                     | >90 |
| Bufatalin                | >90  | Oridonin                           | >90 |
| Caffeic acid             | >90  | Paeoniflorin                       | >90 |
| Caffeic acid ethyl ester | >90  | Paeonolum                          | >90 |
| Cantharidin              | >90  | Palmatine Hydrochloride            | >90 |
| Cardamonin               | >90  | Patchouli alcohol                  | >90 |
| Carvacrol                | >90  | Pectolarin                         | >90 |
| Catalpol                 | >90  | Physcion                           | >90 |
| (+)-Catechin             | >90  | Picroside-II                       | >90 |
| Chonglou Saponin II      | >90  | Pinoresinol diglucoside            | >90 |
| Chlorogenic acid         | >90  | Piperine                           | >90 |
| Cinnamaldehyde           | >90  | Polydatin                          | >90 |
| Cinnamic acid            | >90  | Polygalacic acid                   | >90 |
| Cinobufagin              | >90  | Praeruptorin A                     | >90 |
| Corynoline               | >90  | Prim- <i>o</i> -glucasylicimifugin | >90 |

**Table S2. Cont.**

|                                         |     |                                                                      |     |
|-----------------------------------------|-----|----------------------------------------------------------------------|-----|
| Costunolide                             | >90 | Protocatechuic acid                                                  | >90 |
| Crenulatin b                            | >90 | Protopine                                                            | >90 |
| Crenulatin b_1                          | >90 | Pseudolaric acid B                                                   | >90 |
| Curculigoside                           | >90 | Puerarin                                                             | >90 |
| Curcumin                                | >90 | Pulegone                                                             | >90 |
| Cyclopamine                             | >90 | Quercetin                                                            | >90 |
| Cynandione A                            | >90 | Quercitrin                                                           | >90 |
| $\alpha$ -Cyperone                      | >90 | Resibufogenin                                                        | >90 |
| Daidzein                                | >90 | Rhein                                                                | >90 |
| Dehydroandrographolide                  | >90 | Rhodionin                                                            | >90 |
| Dehydrocostus lactone                   | >90 | Rhodionin_1                                                          | >90 |
| Deoxyschizandrin                        | >90 | Rhodosin                                                             | >90 |
| 3,4-Dihydroxybenzaldehyde               | >90 | Rutaecarpine                                                         | >90 |
| $\beta,\beta$ -Dimethyl-acry-1 alkannin | >90 | Rutin                                                                | >90 |
| Echinacoside                            | >90 | Saikosaponin A                                                       | >90 |
| Emodin                                  | >90 | Salidroside                                                          | >90 |
| Ephedrine                               | >90 | Salvianolic acid B                                                   | >90 |
| (-)-Epicatechin                         | >90 | Sarsasapogenin                                                       | >90 |
| Esculetin                               | >90 | Schisantherin A                                                      | >90 |
| Esculin                                 | >90 | Schizandrin                                                          | >90 |
| Eucalyptol                              | >90 | Scopolamine<br>Hydrobromide                                          | >90 |
| Eugenol                                 | >90 | Scopoletin                                                           | >90 |
| Evodiamine                              | >90 | Scutellarin                                                          | >90 |
| Fangchinoline                           | >90 | Sennoside                                                            | >90 |
| Ferulic acid                            | >90 | Sesamin                                                              | >90 |
| Formononetin                            | >90 | Shionone                                                             | >90 |
| Forsythin                               | >90 | Silibinin                                                            | >90 |
| Fraxetin                                | >90 | Sinapine                                                             | >90 |
| Fraxinellone                            | >90 | Sinomenine                                                           | >90 |
| Gallic acid                             | >90 | $\beta$ -Sitosterol                                                  | >90 |
| Gastrodin                               | >90 | Sophoricoside                                                        | >90 |
| Geniposide                              | >90 | Stachydrine hydrochloride                                            | >90 |
| Ginkgolide A                            | >90 | Strychnine                                                           | >90 |
| Ginkgolide B                            | >90 | Synephrine                                                           | >90 |
| Ginkgolide C                            | >90 | Syringin                                                             | >90 |
| Ginsenoside F1                          | >90 | Syzalterin                                                           | >90 |
| Ginsenoside Rb1                         | >90 | Tectoridin                                                           | >90 |
| Ginsenoside Re                          | >90 | Tetrandrine                                                          | >90 |
| Ginsenoside Rg1                         | >90 | Tetrahydropalmatine                                                  | >90 |
| Glycyrrhetic acid                       | >90 | 2,3,5,4-Tetrahydroxyl<br>diphenylethylene<br>-2- <i>o</i> -glucoside | >90 |
| Harpagoside                             | >90 | Thalictrifoline                                                      | >90 |
| Hederagenin                             | >90 | Thymol                                                               | >90 |
| Hesperidin                              | >90 | Tubeimoside IV                                                       | >90 |

**Table S2. Cont.**

|                         |     |                    |     |
|-------------------------|-----|--------------------|-----|
| Hupehenine              | >90 | Typhaneoside       | >90 |
| 5-Hydroxymethylfurfural | >90 | Vanillic acid      | >90 |
| Hydroxysafflor yellow A | >90 | Veratramin         | >90 |
| Hypaconitine            | >90 | Vitexicarpin       | >90 |
| Hyperoside              | >90 | Vitexin            | >90 |
| Icariside I             | >90 | Vitexin glucoside  | >90 |
| Icariside II            | >90 | Vitexin rhamnoside | >90 |
